# Supplementary material for: Detecting false positive sequence homology: a machine learning approach
Source: PubMed Central journal article supplement (PMC4765110; doi:10.1186/s12859-016-0955-3), 2016-02-24

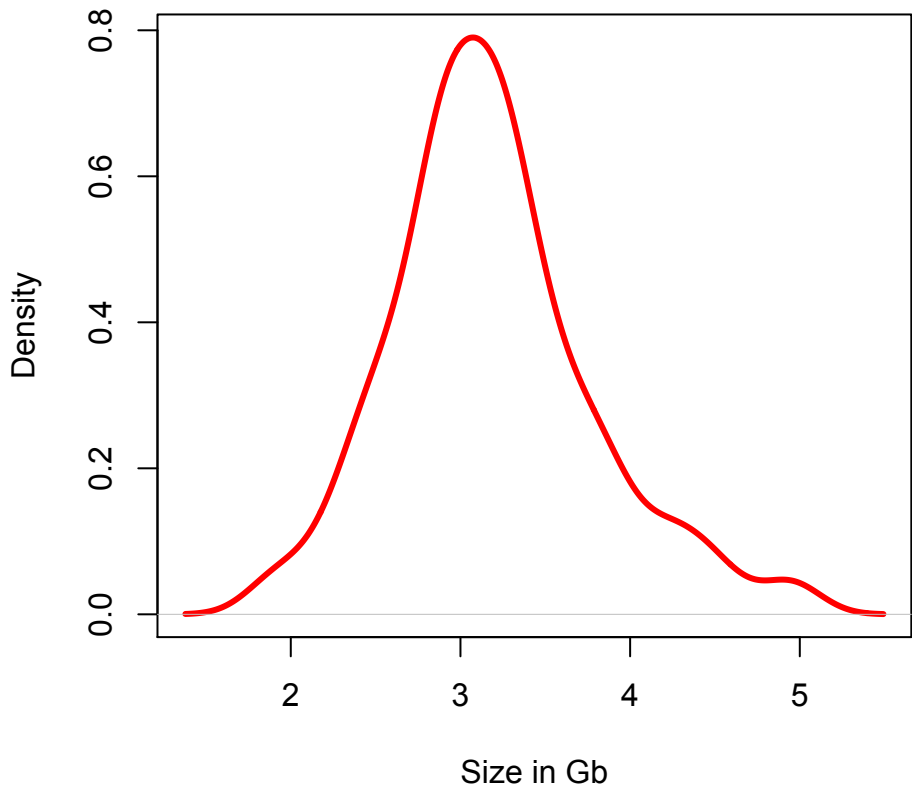

Supplement: 12859_2016_955_MOESM2_ESM.pdf [file 12859_2016_955_MOESM2_ESM.pdf]
